# Supplementary material for: Electrochemical characterisation and comparison of transport in Nafion films and particles
Source: Royal Society of Chemistry journal article supplement (doi:10.1039/c8cp06504g), 2018-12-10
Supplement: c8cp06504g1.pdf [file c8cp06504g1.pdf]

Supporting Information

**Electrochemical Characterisation and Comparison of Transport in Nafion  
Films and Particles**

Lifu Chen<sup>1</sup>, ChuHong Lin<sup>1</sup>, Richard G Compton\*

Department of Chemistry, Physical and Theoretical Chemistry Laboratory, Oxford  
University, South Parks Road, Oxford OX1 3QZ, UK

\*To whom correspondence should be addressed

Email: richard.compton@chem.ox.ac.uk

Phone: +44 (0) 1865 275957

Fax: +44 (0) 1865 275410

<sup>1</sup>: These authors contributed equally to the paper.

## I Determination of the MV-Nafion thin film dry thickness on GC

0.1  $\mu\text{L}$  of MV-Nafion stock mixture was drop-cast on the GC electrode and the film dry thickness can be determined as followed:

Mass of 0.1  $\mu\text{L}$  Nafion is

$$m = V \cdot \rho \cdot \text{wt}\% = 0.1\mu\text{L} \times 0.921\text{g} / \text{cm}^3 \times 5\% = 4.61 \times 10^{-6} \text{g}$$

where  $\rho$  is the density of Nafion perfluorinated resin solution, whose value obtained from the supplier Sigma-Aldrich.

The density of dry Nafion is relevant to its storage and drying conditions and in this case the dry density of Nafion,  $\rho_{\text{DryNafion}}$ , is  $1.965 \text{ g cm}^{-3}$ .<sup>1</sup>

Therefore the dry volume of Nafion is

$$V = \frac{m}{\rho_{\text{DryNafion}}} = 2.48 \times 10^{-12} \text{m}^3$$

The diameter of GC electrode is 3 mm, hence the area is  $A = D^2 / 4 = 7.07 \times 10^{-6} \text{m}^2$

The dry thickness for 0.1  $\mu\text{L}$  of MV-Nafion thin film on the GC electrode is

$$h = \frac{V}{A} = \frac{2.48 \times 10^{-12} \text{m}^3}{7.07 \times 10^{-6} \text{m}^2} = 0.35 \mu\text{m}$$

Similarly, the dry thickness for 0.5  $\mu\text{L}$  and 1.5  $\mu\text{L}$  of MV-Nafion thin film on the GC can be determined as 1.75  $\mu\text{m}$  and 5.26  $\mu\text{m}$  respectively.

## II Determination of the number of MV-Nafion particle layers drop-cast on glassy carbon electrodes

For single MV-Nafion particle, the average radius is  $0.43 \pm 0.26 \mu\text{m}$  and the density of Nafion in water,  $\rho_{\text{DryNafion}}$ , is  $1.858 \text{ g cm}^{-3}$ .<sup>1</sup>

Hence the mass for single particles is

$$m_{\text{Nafion}} = \frac{4}{3} \pi r^3 \rho_{\text{Nafion}} = 6.36 \times 10^{-13} \text{ g}$$

Total mass of Nafion used to synthesize Nafion particles is

$$m_{\text{total}} = V \cdot \rho \cdot \text{wt}\% = 50 \mu\text{L} \times 0.921 \text{ g / cm}^3 \times 12.5\% = 5.76 \times 10^{-3} \text{ g}$$

The number of Nafion particle synthesized is

$$N = \frac{m_{\text{total}}}{m_{\text{Nafion}}} = \frac{5.76 \times 10^{-3} \text{ g}}{6.36 \times 10^{-13} \text{ g}} = 9.05 \times 10^9$$

Final Nafion particle suspension volume is 0.5 mL.

Then the concentration of Nafion particle suspension is

$$C = \frac{N}{V} = \frac{9.05 \times 10^9}{0.5 \text{ mL}} = 1.81 \times 10^{10} \text{ particles / mL}$$

Hence the number of Nafion particle drop-casted on the GC electrode is

$$N_{\text{GC}} = C \cdot V_{\text{GC}} = 1.81 \times 10^{10} \text{ particles / mL} \times 10 \mu\text{L} = 1.81 \times 10^8 \text{ particles}$$

Number of layers Nafion particles is

$$N_{\text{layers}} = \frac{A_{\text{particles}}}{A_{\text{GC}}} = \frac{\pi \times (0.43 \mu\text{m})^2 \times 1.81 \times 10^8}{7.07 \times 10^{-6} \text{ m}^2} = 15 \text{ layers}$$

### III Simulation of the cyclic voltammetry of $MV^{2+}/MV^+$ via the single Nafion particle model

To explore the ion transport property of  $MV^{2+}/MV^+$  in Nafion particles, we measured the cyclic voltammetry of immobilized Nafion particles with different drop-casting amounts under variable scan rates. As the redox species are confined in Nafion particles, the single particle model is applied when simulating multiple layers of immobilized Nafion particles. The experiment data is analysed via the single Nafion particle model, by which the approximate ion transport time  $\tau_{it}$ , the diffusion difference between the reactant and the product  $D_{MV^+}/D_{MV^{2+}}$ , and the contacting area where the immobilized particle attached on the electrode are determined.

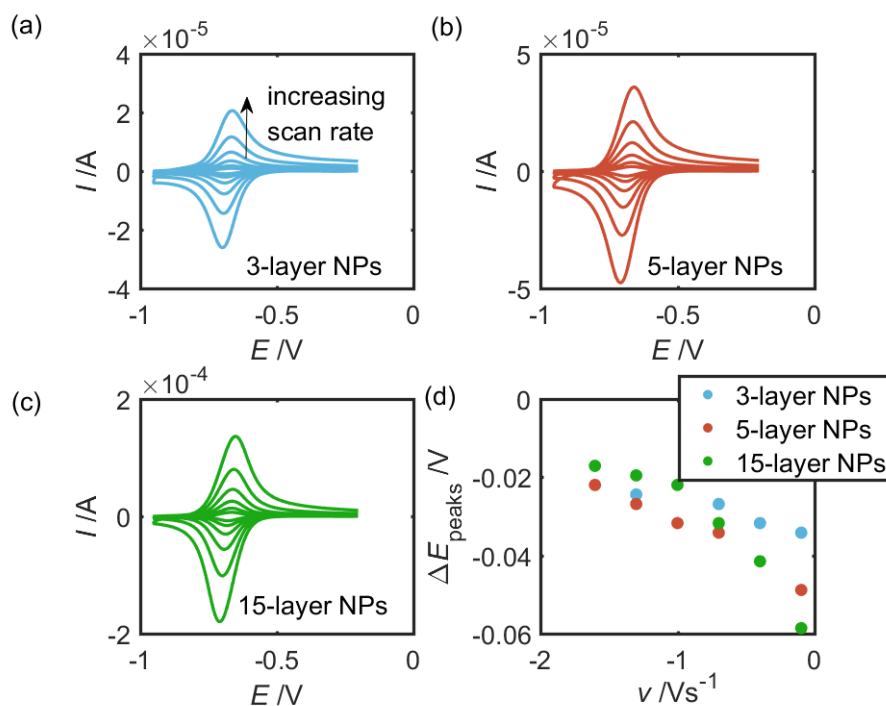

**Figure S1** (a) Cyclic voltammograms of 3-layer Nafion particles modified electrode under various scan rates of 0.025, 0.05, 0.1, 0.2, 0.4, 0.8  $V s^{-1}$ ; (b) Cyclic voltammograms of 5-layer Nafion particles; (c) Cyclic voltammograms of 15-layer Nafion particles; (d) Scan rate dependence of the peak-to-peak separation of the 3-layer, 5-layer and 15-layer Nafion particles. Experiment conditions are mentioned in the main text.

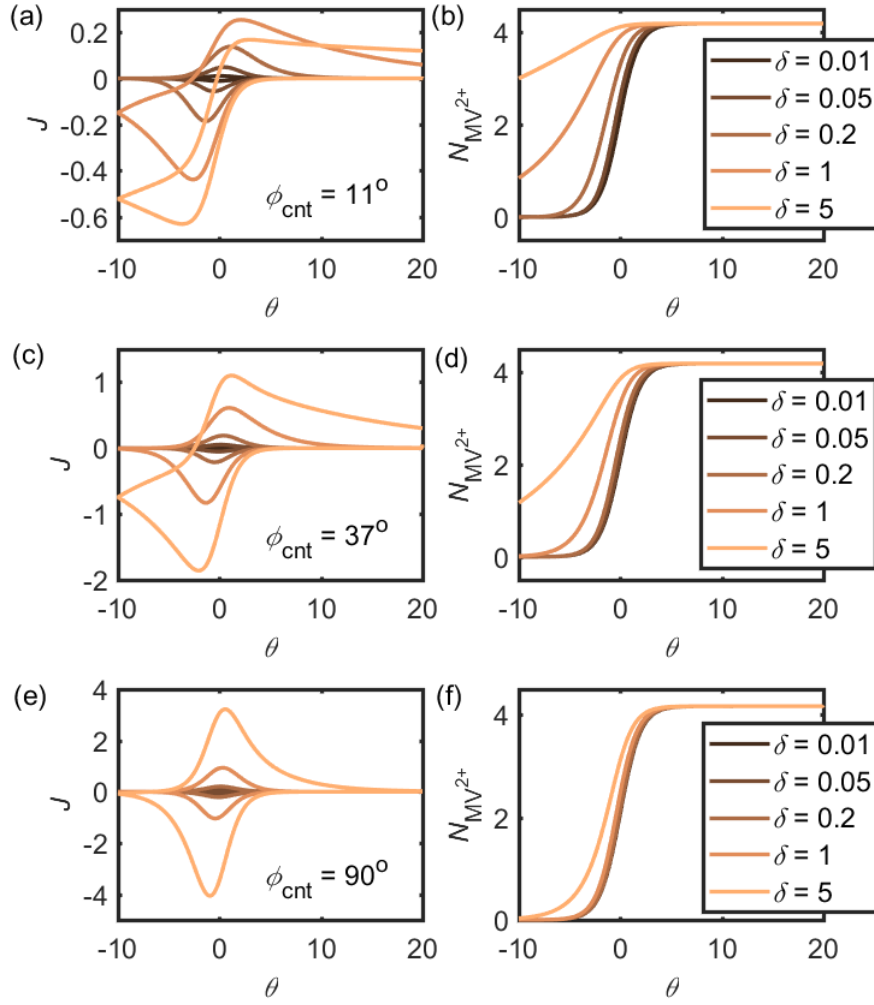

**Figure S2** (a) Dimensionless cyclic voltammogram simulated for one particle of  $11^\circ$  contacting angle under a series of scan rates. (b) Dimensionless mass variation of the reactant during the reaction. (c) and (d) are the cyclic voltammogram and the mass variation for one particle of  $37^\circ$  contacting angle; (e) and (f) are the cyclic voltammogram and the mass variation for one particle of  $90^\circ$  contacting angle. In the simulation  $D_{MV^+}/D_{MV^{2+}}$  is set to be 0.5 and other simulation conditions are the same as in the main text.

The cyclic voltammetry of 3, 5 and 15 layers of  $MV^{2+}$  doped Nafion particles under variable scan rates is presented in Figure S1 a, b and c. The scan rate implemented in the experiment for each electrode is 0.025, 0.05, 0.1, 0.2, 0.4, 0.8  $\text{V s}^{-1}$ . The scan rate dependence of the forward and backward peak currents has been shown in Figure 7 in the main text and the peak-to-peak separation  $\Delta E_{\text{peaks}}$ , the difference between the forward and backward peak potentials, is shown in Figure S1 d. Comparing to the current-time response measured from

the single particle experiment, the immobilized particles provide three fitting features, the forward peak current, the backward peak current and the peak-to-peak separation, which can be used as the fitting objectives.

In the single particle simulation model, as explained in the main text, not only the ion transport time  $\tau_{it}$  and the diffusion coefficient difference between  $MV^+$  and  $MV^{2+}$   $D_{MV^+}/D_{MV^{2+}}$  but also the contacting angle of the particle  $\phi_{cnt}$  are unknown. To explore the scan rate dependence of the cyclic voltammogram in the Nafion particles, Figure S2 shows the simulation results of various scan rates and three different contacting angles. The simulation results are presented in the dimensionless format, where  $J$  is the flux,  $\theta$  is the overpotential,  $\delta$  is the scan rate and  $N_{MV^{2+}}$  is the mass of  $MV^{2+}$  in one Nafion particle. The dimensionless  $MV^{2+}$  mass in one particle is  $4/3\pi$  before the electrochemical reaction. Figure S2 a and b are the simulation results in which the contacting area between the particle and the electrode is relatively small. In Figure S2a, the waveshape of the cyclic voltammogram with a small contacting area varies when the scan rate increases and only at low scan rate, the simulated waveshape is similar to that observed in the experiment. Figure S2b explains the waveshape variation as a function of the scan rate. It is found that only when the reactant can be fully assumed, for instance the case of  $\delta = 0.01$ , the experiment-like waveshape can be observed in the simulation. Similar phenomena can be found in simulations with larger contacting areas as shown in Figure S2 c-f.

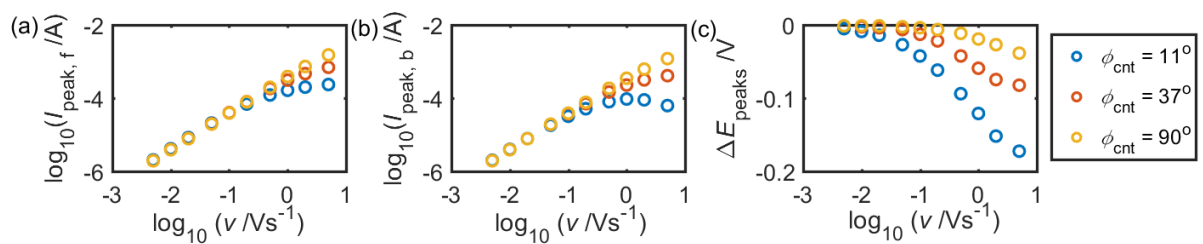

**Figure S3** Scan rate dependence of (a) simulated forward peak currents, (b) simulated backward peak currents, (c) simulated peak-to-peak separations. Three different contacting angles are presented,  $11^\circ$ ,  $37^\circ$  and  $90^\circ$ . In the simulation,  $\tau_{it}$  is set as 0.025 s and  $D_{MV^+}/D_{MV^{2+}} = 0.5$ . The reaction charge  $Q$  applied is measured from the 15-layer Nafion particle experiment and  $Q = 4.0 \times 10^{-5}$  C.

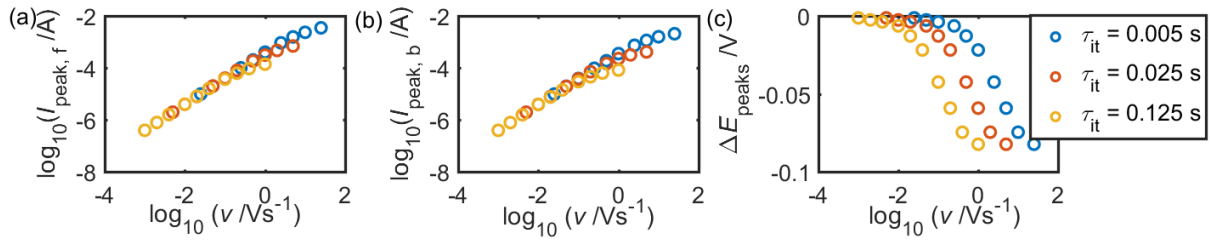

**Figure S4** Scan rate dependence of (a) simulated forward peak currents, (b) simulated backward peak currents, (c) simulated peak-to-peak separations. Three different ion transport time are presented, 0.005, 0.025 and 0.125 s. In the simulation,  $\phi_{\text{cnt}}$  is set as  $37^\circ$  and  $D_{\text{MV}^+}/D_{\text{MV}^{2+}} = 0.5$ . The reaction charge  $Q$  applied is measured from the 15-layer Nafion particle experiment and  $Q = 4.0 \times 10^{-5} \text{ C}$ .

To determine the unknown parameters  $\tau_{\text{it}}$ ,  $D_{\text{MV}^+}/D_{\text{MV}^{2+}}$  and  $\phi_{\text{cnt}}$ , we need to compare the forward peak current, the backward peak current and the peak-to-peak separation. The transformation between the dimensionless and dimensional variables has been explained in the main text. Figure S3 illustrates the scan rate dependence of the simulated peak currents and peak-to-peak separation in the dimensional format. Three contacting areas with the same  $\tau_{\text{it}}$  (0.025 s) and  $D_{\text{MV}^+}/D_{\text{MV}^{2+}}$  (0.5) are compared. It is found that only at low scan rate the peak current increases linearly as a function of the scan rate; and the scan rate dependence of the peak-to-peak separation varies with the contacting area. Figure S4 illustrates the scan rate dependence with constant contacting angle  $\phi_{\text{cnt}}$  ( $37^\circ$ ) and  $D_{\text{MV}^+}/D_{\text{MV}^{2+}}$  (0.5). Three ion transport times are applied in Figure S4. Varying  $\tau_{\text{it}}$  alters the peak current increasing region while the scan rate dependence of the peak-to-peak separation is irrelevant to the value of  $\tau_{\text{it}}$ . In the data fitting procedure, not only the scale of the fitting objectives but also the dependence on certain variables needs to be taken into consideration. As shown in Figure S1 and Figure 7 in the main text, the experimental peak currents increases with the scan rate and the peak-to-peak separation varies among the three Nafion particle modified electrodes. Therefore, combining the simulation result with the experiment data, it can be determined that  $\tau_{\text{it}}$  is approximately 0.025 s for  $\text{MV}^{2+}$  in Nafion particles,  $D_{\text{MV}^+}/D_{\text{MV}^{2+}}$  is ca. 0.5 and the contacting angles for the 3-layer, 5-layer and 15-layer Nafion particles to be ca.  $45^\circ$ ,  $30^\circ$  and  $18^\circ$ .

## IV Supplementary Experimental Data

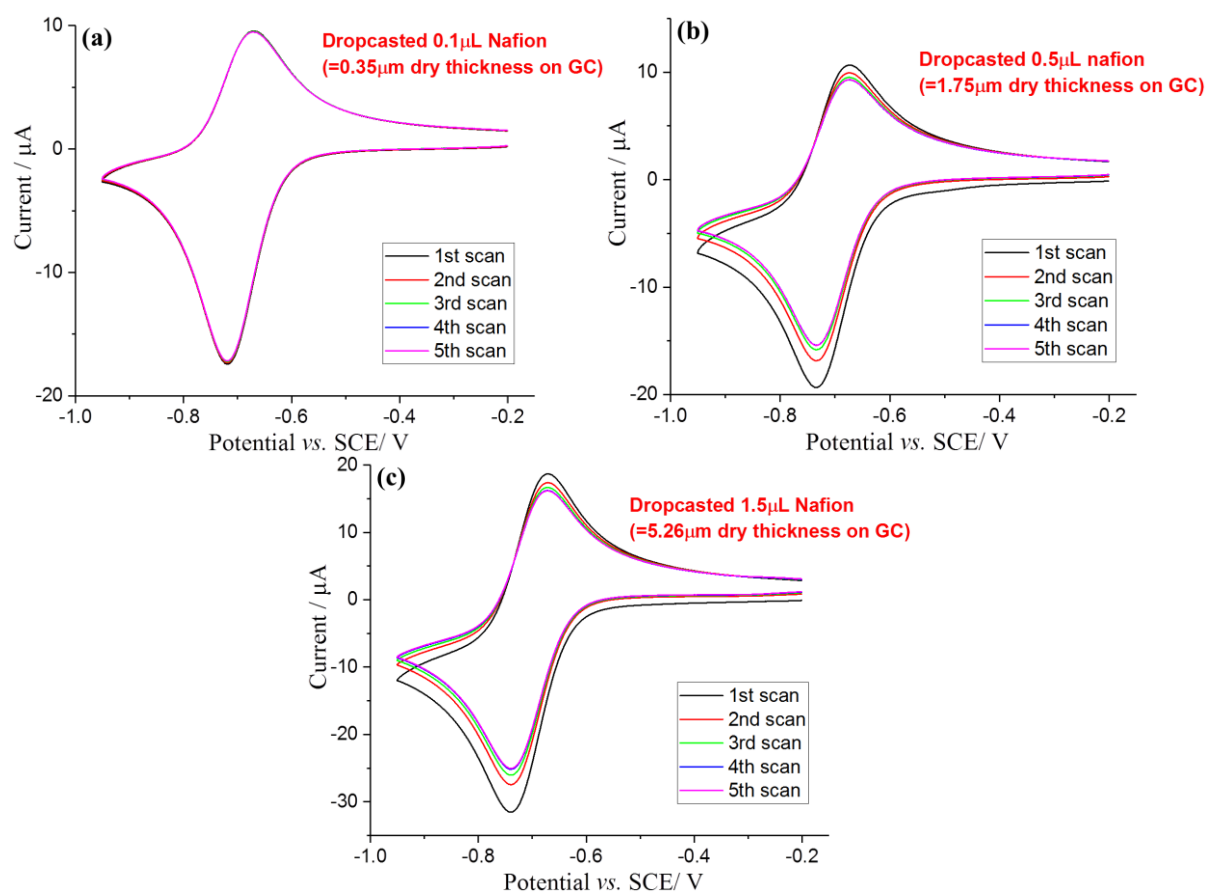

**Figure S5** Multiple-scan experimental CVs for (a) film 1, of which the dry thickness is 0.35  $\mu\text{m}$  (b) film 2, of which the dry thickness is 1.75  $\mu\text{m}$  (c) film 3, of which the dry thickness is 5.26  $\mu\text{m}$ ; scan rate = 0.1 V/s



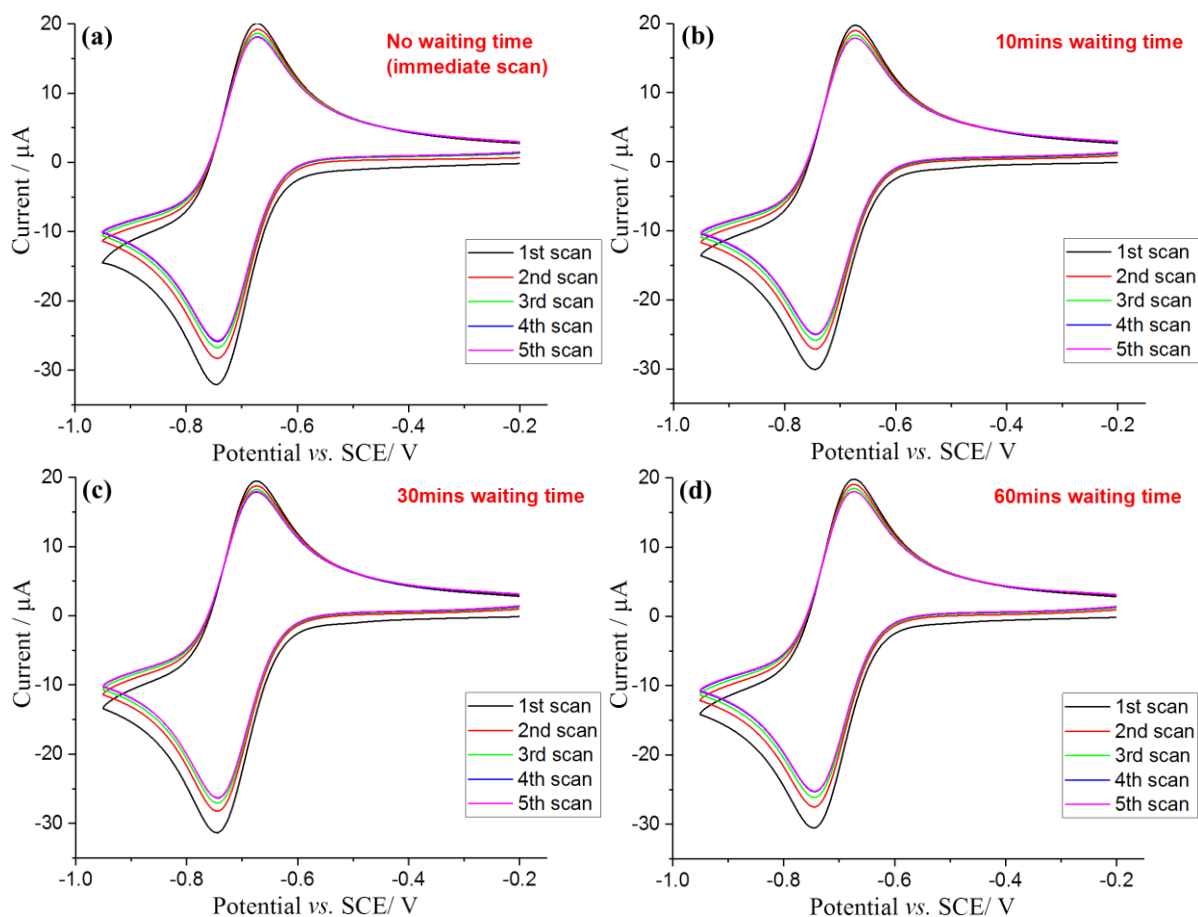

**Figure S6** Multiple-scan experimental CVs of film 3 (with dry thickness  $5.26 \mu\text{m}$ ) for different waiting time after immersing the films into the buffer solution (a) no waiting time (b) 10mins waiting time (c) 30mins waiting time (d) 60mins waiting time; scan rate =  $0.1 \text{ V/s}$

## References

1. T. Takamatsu and A. Eisenberg, *Journal of Applied Polymer Science*, 1979, 24, 2221-2235.
